# Supplementary material for: Cancer progression by breast tumors with Pit-1-overexpression is blocked by inhibition of metalloproteinase (MMP)-13
Source: Springer Nature journal article supplement (doi:10.1186/s13058-014-0505-8), 2014-12-19

MCF-7 cells

Additional file 4  
Figure S2

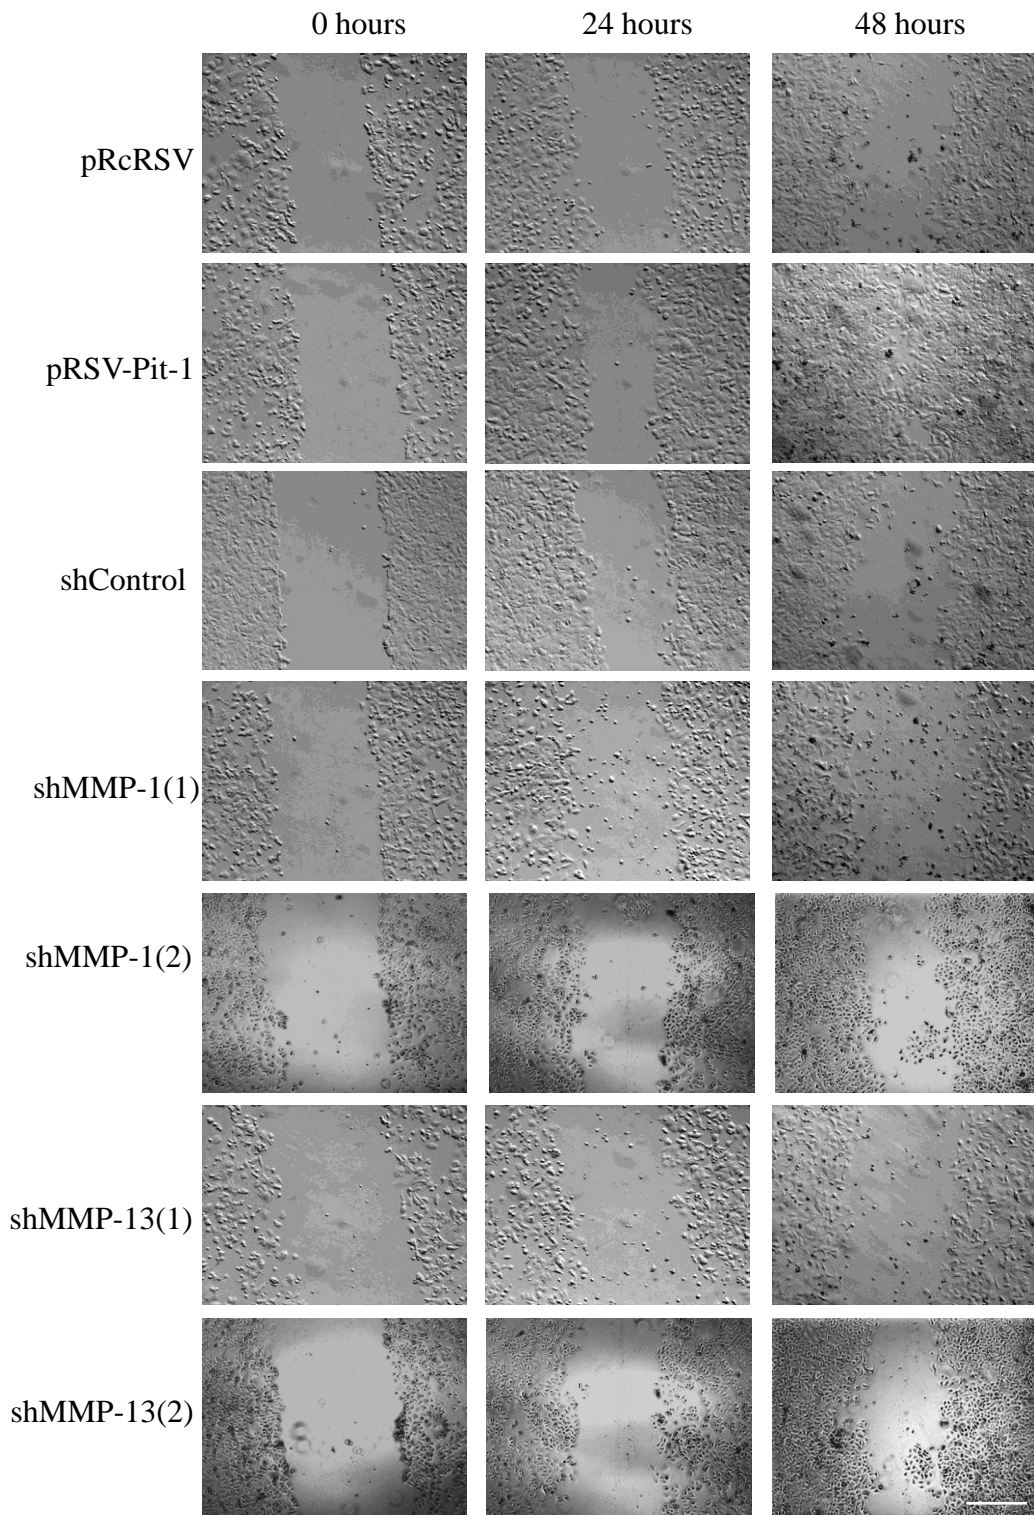

**MCF-7 cells**

0 hours

24 hours

48 hours

Pit-1+  
shControl

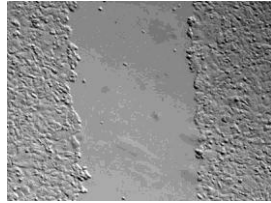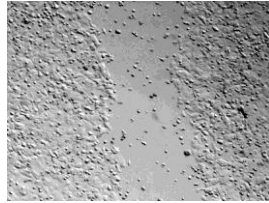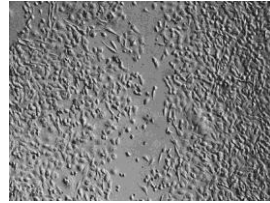

Pit-1+  
shMMP-1(1)

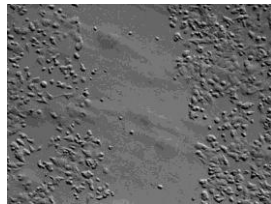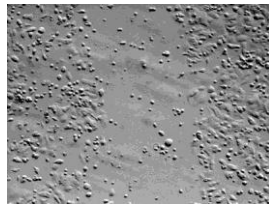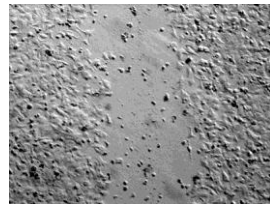

Pit-1+  
shMMP-1(2)

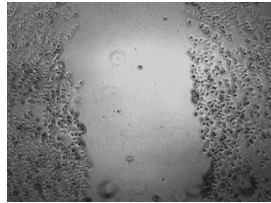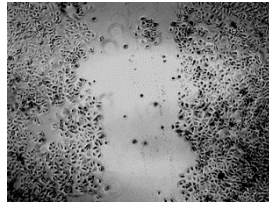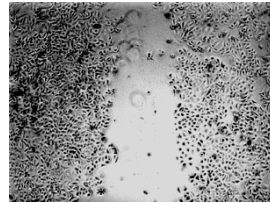

Pit-1+  
shMMP-13(1)

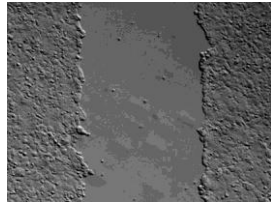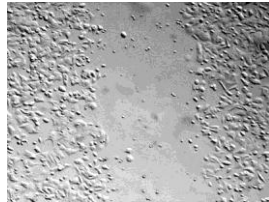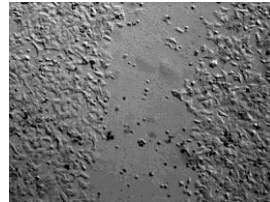

Pit-1+  
shMMP-13(2)

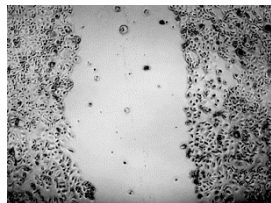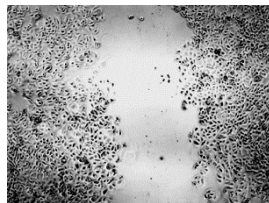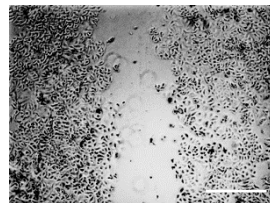

Supplement: MOESM4 [file 9781308]
