# Supplementary material for: Cancer progression by breast tumors with Pit-1-overexpression is blocked by inhibition of metalloproteinase (MMP)-13
Source: PubMed Central journal article supplement (PMC4305241; doi:10.1186/s13058-014-0505-8), 2014-12-20
Supplement: 13058_2014_505_MOESM3_ESM.pdf [file 13058_2014_505_MOESM3_ESM.pdf]

Additional file 3  
Table S1

| <b>CHARACTERISTICS</b>                 | <b>Without recurrence<br/>No. (%)</b> | <b>With recurrence<br/>No. (%)</b> |
|----------------------------------------|---------------------------------------|------------------------------------|
| <b>Total cases</b>                     | 52 (100)                              | 58 (100)                           |
| <b>Age (years)</b>                     |                                       |                                    |
| ≤ 56.5                                 | 25 (48.1)                             | 30 (51.7)                          |
| > 56.5                                 | 27 (51.9)                             | 28 (48.3)                          |
| <b>Menopausal status</b>               |                                       |                                    |
| Premenopausal                          | 17 (32.7)                             | 17 (29.3)                          |
| Postmenopausal                         | 35 (67.3)                             | 41 (70.7)                          |
| <b>Tumoral size</b>                    |                                       |                                    |
| T1                                     | 27 (51.9)                             | 25 (43.1)                          |
| T2                                     | 25 (48.1)                             | 33 (56.9)                          |
| <b>Nodal status</b>                    |                                       |                                    |
| N (-)                                  | 27 (51.9)                             | 25 (43.1)                          |
| N (+)                                  | 25 (48.1)                             | 33 (56.9)                          |
| <b>Histological grade</b>              |                                       |                                    |
| Well Dif. (I)                          | 19 (36.5)                             | 13 (22.4)                          |
| Mod. Dif. (II)                         | 27 (51.9)                             | 26 (44.8)                          |
| Poorly Dif. (III)                      | 6 (11.5)                              | 19 (32.8)                          |
| <b>Nottingham prognostic index</b>     |                                       |                                    |
| <3.4                                   | 25 (48.1)                             | 14 (24.1)                          |
| 3.4-5.4                                | 21 (40.4)                             | 32 (55.2)                          |
| >5.4                                   | 6 (11.5)                              | 12 (20.7)                          |
| <b>Estrogen Receptor</b>               |                                       |                                    |
| Negative                               | 15 (28.8)                             | 31 (53.4)                          |
| Positive                               | 37 (71.2)                             | 27 (46.6)                          |
| <b>Progesterone Receptor</b>           |                                       |                                    |
| Negative                               | 19 (36.5)                             | 39 (67.2)                          |
| Positive                               | 33 (63.5)                             | 19 (32.8)                          |
| <b>Adjuvant radiotherapy</b>           |                                       |                                    |
| No                                     | 40 (76.9)                             | 32 (55.2)                          |
| Yes                                    | 12 (23.1)                             | 26 (44.8)                          |
| <b>Adjuvant systemic therapy</b>       |                                       |                                    |
| Chemotherapy                           | 14 (26.9)                             | 25 (43.1)                          |
| Tamoxifen                              | 21 (40.4)                             | 14 (24.1)                          |
| Chemotherapy plus sequential Tamoxifen | 10 (19.2)                             | 6 (10.3)                           |
| No treatment                           | 7 (13.5)                              | 13 (22.4)                          |
| <b>HER2 Status</b>                     |                                       |                                    |
| Negative                               | 43 (82.7)                             | 48 (82.8)                          |
| Positive                               | 9 (17.3)                              | 10 (17.2)                          |
| <b>Basal like phenotype</b>            |                                       |                                    |
| Non basal like                         | 43 (82.7)                             | 37 (63.8)                          |
| Basal like                             | 9 (17.3)                              | 21 (36.2)                          |
