# Supplementary material for: Cancer progression by breast tumors with Pit-1-overexpression is blocked by inhibition of metalloproteinase (MMP)-13
Source: PubMed Central journal article supplement (PMC4305241; doi:10.1186/s13058-014-0505-8), 2014-12-20

**Pit-1 score values**

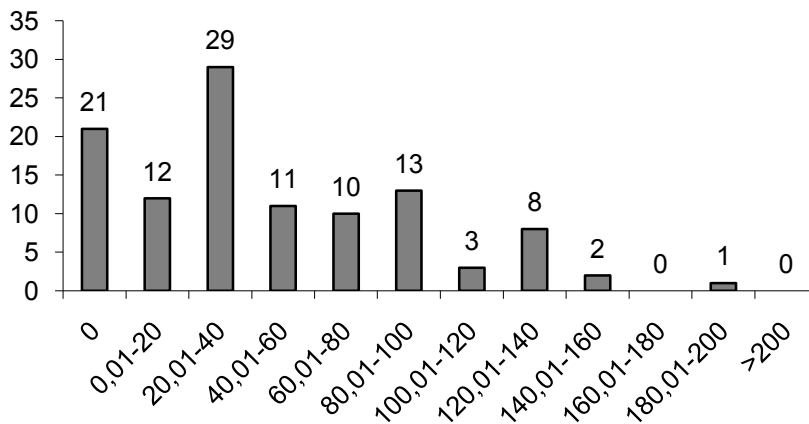

**MMP-1 score values**

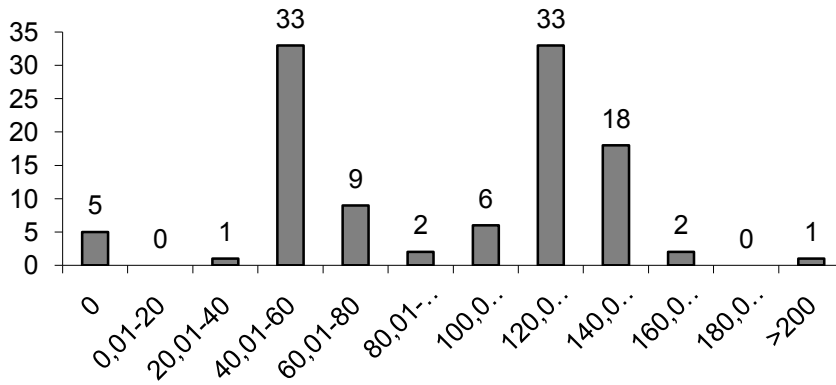

**MMP-13 score values**

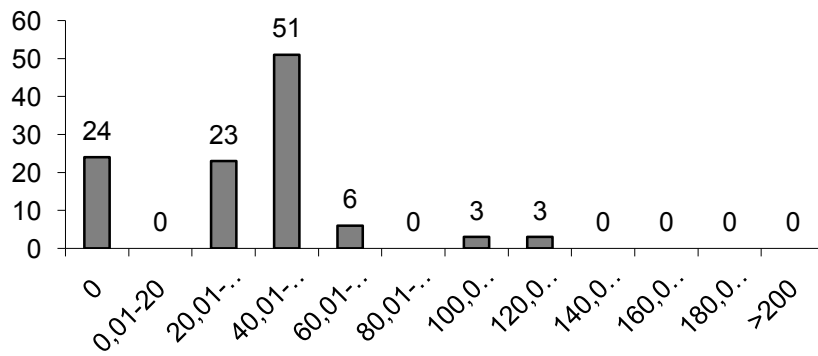

Supplement: 13058_2014_505_MOESM8_ESM.pdf [file 13058_2014_505_MOESM8_ESM.pdf]
