# Supplementary material for: Cancer progression by breast tumors with Pit-1-overexpression is blocked by inhibition of metalloproteinase (MMP)-13
Source: Springer Nature journal article supplement (doi:10.1186/s13058-014-0505-8), 2014-12-19
Supplement: MOESM1 [file 9781308]

## Additional File 1

### Plasmids and transfections

The shMMP-1 and shMMP-13 sequences were the following:

|                    | <b>Oligonucleotide sequences</b>                                       |
|--------------------|------------------------------------------------------------------------|
| shpLKO.1-MMP-1(1)  | 5'-CCGG-TGAAGATGAAAGGTGGACCAACTCGAGTT<br>GGTCCACCTTTCATCTTCA-TTTTT-3'  |
| shpLKO.1-MMP-1(2)  | 5'-CCGG-AGCACATGACTTTCCTGGAATCTCGAGATTC<br>CAGGAAAGTCATGTGCT-TTTTT-3'  |
| shpLKO.1-MMP-13(1) | 5'-CCGG-CCAACCGTATTGATGCTGCATCTCGAGATGCA<br>GCATCAATACGGTTGG-TTTTTG-3' |
| shpLKO.1-MMP-13(2) | 5'-CCGG-GCTCCGAGAAATGCAGTCTTCTCGAGAAAGA<br>CTGCATTTCTCGGAGC-TTTTTG-3'  |

The MISSION pLKO.1-puro Non-Target shRNA Control Transduction Particles (Sigma-Aldrich) containing a shRNA insert that does not target any known genes from any species was used as control.

The proximal promoter regions of the human MMP-1 gene (pGL2-B-MMP-1.<sub>1633/-1</sub>, pGL2-B-MMP-1.<sub>1040/-1</sub>, pGL2-B-MMP-1.<sub>738/-1</sub> and pGL2-B-MMP-1.<sub>216/-1</sub>) were synthesized by PCR using the following oligonucleotides:

|                                       | <b>Oligonucleotide sequences</b>    |
|---------------------------------------|-------------------------------------|
| pGL2-B-MMP-1. <sub>1633/-1</sub> (Fw) | 5'-CCGCTCGAGGAAATTGTAGTTAAATAATT-3' |
| pGL2-B-MMP-1. <sub>1040/-1</sub> (Fw) | 5'-CCGCTCGAGAGCCTTTCATCATCCGGTA-3'  |
| pGL2-B-MMP-1. <sub>738/-1</sub> (Fw)  | 5'-CCGCTCGAGCATGACTCCATGCTTGGCTA-3' |
| pGL2-B-MMP-1. <sub>216/-1</sub> (Fw)  | 5'-CCGCTCGAGGAGTGTGTCTCCTTCGCACA-3' |
| Reverse primer (-20/-1)               | 5'-CCCAAGCTTATCCCAGCTAGGAAGCTCCC-3' |

The proximal promoter regions of the human MMP-13 gene (pGL2-B-MMP-13.<sub>1548/+2</sub>, pGL2-B-MMP-13.<sub>1329/+2</sub>, pGL2-B-MMP-13.<sub>1148/+2</sub>, pGL2-B-MMP-13.<sub>858/+2</sub>, pGL2-B-MMP-13.<sub>393/+2</sub>, pGL2-B-MMP-1.<sub>145/-1</sub>) were synthesized by PCR using the following oligonucleotides:

|                                        | <b>Oligonucleotide sequences</b>        |
|----------------------------------------|-----------------------------------------|
| pGL2-B-MMP-13. <sub>1548/+2</sub> (Fw) | 5'- CCGCTCGAGCATCAAATGGGCATCTCCT-3'     |
| pGL2-B-MMP-13. <sub>1329/+2</sub> (Fw) | 5'-CCGCTCGAGGGAACCAAGAATTAGAATAT-3'     |
| pGL2-B-MMP-13. <sub>1148/+2</sub> (Fw) | 5'-CCGCTCGAGTCAGGGGTGTAATTCACAATTC-3'   |
| pGL2-B-MMP-13. <sub>858/+2</sub> (Fw)  | 5'-CCGCTCGAGTGCTAAAATTTAGATTACATTGA-3'  |
| pGL2-B-MMP-13. <sub>393/+2</sub> (Fw)  | 5'-CCGCTCGAGTGACATCTAAGGTGTTATCGTCAA-3' |

|                                      |                                     |
|--------------------------------------|-------------------------------------|
| pGL2-B-MMP-1 <sub>-145/+2</sub> (Fw) | 5'-CCGCTCGAGTGCAAAGTGGAGGTCTTCCT-3' |
| Reverse primer (-18/+2)              | 5'-CCCAAGCTTATCAACAGTCCCCAGGCATC-3' |

### Pit-1 siRNA

For silencing Pit-1, MCF-7 cells were transfected with two different Pit-1 siRNA (Pit-1 siRNA-1, Pit-1 siRNA-2). A scrambled siRNA was used as control. Primer sequences were the following:

|                 | Oligonucleotide sequences                                                                                                                                                              |
|-----------------|----------------------------------------------------------------------------------------------------------------------------------------------------------------------------------------|
| Pit-1 siRNA-1   | site 1, 5'-AACCCCTTGTCTTTACAAGTTCCTGTCTC-3'<br>(antisense)<br>site-2, 5'-AATTAAGTTAGGATACACCCACCTGTCTC-3'<br>(antisense)<br>site-3, 5'-AATTGAATCTCGAGAAAGAAGCCTGTCTC-3'<br>(antisense) |
| Pit-1 siRNA-2   | site-1, 5'-AATGTTGCTGTAGACATCACACCTGTCTC-3'<br>(antisense)<br>site-2, 5'-AAGCTTTCAGTTTGCATGCATCCTGTCTC-3'<br>(antisense)<br>site-3, 5'-AACTTCTCCAGATTCAGTTCCTGTCTC-3'<br>(antisense)   |
| Scrambled siRNA | 5'-AAGCTTCATAAGGCGCATAGC-3'                                                                                                                                                            |

### CHIP assay

MMP-1 and MMP-13 primer sequences were as follows:

|        | Oligonucleotide sequences                                                                                                                                                                                                                                                                                                                                                                                                 |
|--------|---------------------------------------------------------------------------------------------------------------------------------------------------------------------------------------------------------------------------------------------------------------------------------------------------------------------------------------------------------------------------------------------------------------------------|
| MMP-1  | (A) Sense: 5'-ACAGTGGGAAAGGTGGGAGAC-3'<br>Antisense 5'-GTCTATCTTCGCTCCTTGGTGCT-3'<br>(B) Sense 5'-AGCACCAAGGAGCGAAGATAGAC-3'<br>Antisense 5'-GAGGCTGCATTGAGCTGTGA-3'<br>(C) Sense 5'-TCACAGCTCAATGCAGCCTC-3'<br>Antisense 5'-CAGGGCAGAGGGTGGAAATTAC-3'<br>(D) Sense 5'-GTAATTCCACCTCTGCCCTG-3'<br>Antisense 5'-GTGATGGCTTCCCAGCCTCT-3'                                                                                    |
| MMP-13 | (A) Sense: 5'-CATCATCAAAATGGGCATCT-3'<br>Antisense 5'-ATGATGTCAGCAATGCCATC-3'<br>(B) Sense 5'-GCACAGGTGTTTGGTAAATTAGTG-3'<br>Antisense 5'-TGGA ACTCTTCATCTTGAGCA-3'<br>(C) Sense 5'-TGCTAAAAGTTTAGATTACATTGA-3'<br>Antisense 5'-GCATCTTGGCTTTTTCATGA-3'<br>(D) Sense 5'-TCTCGGCAACCATATTAAGCT-3'<br>Antisense 5'-ATGTACCAACCGCATCATCA-3'<br>(E) Sense 5'-GGAGCCTCTCAGTCATGGAG-3'<br>Antisense 5'-GATGCCTGGGGACTGTTGAT-3'. |

The length of MMP-1 PCR products were 378 pb (A), 327 pb (B), 447 pb (C), and 425 pb (D). The length of MMP-13 PCR products were 315 pb (A), 635 pb (B), 470 pb (C), 444 pb (D), and 327 pb (D).

## Real-Time PCR

The oligonucleotide sequences were as follows:

|        | Oligonucleotide sequences                                                      |
|--------|--------------------------------------------------------------------------------|
| Pit-1  | Sense: 5'-GTGTCTACCAGTCTCCAACC-3'<br>Antisense: 5'-ACTTTTCCGCCTGAGTTCCT-3      |
| MMP-1  | Sense: 5'-ATGCTGAAACCCTGAAGGTG -3'<br>Antisense: 5'-CTGCTTGACCC- TCAGAGACC -3' |
| MMP-13 | Sense: 5'-TAAGGAGCATGGCGACTTCT-3'<br>Antisense: 5'-GGTCCTTGGAG-TGGTCAAGA-3'    |
| 18S    | Sense: 5'-GTAACCCGTTGAACCCCAT-3'<br>Antisense: 5'-CCATCCAATCGCTA GTAGCG-3'     |

## Antibodies

| Primary antibodies             | Antibody dilution | Origin                      | Secondary antibody |
|--------------------------------|-------------------|-----------------------------|--------------------|
| MMP-1<br>(polyclonal)          | 1:1000            | Millipore                   | Anti-rabbit        |
| MMP-13<br>(polyclonal)         | 1:1000            | Santa Cruz<br>Biotechnology | Anti-rabbit        |
| Pit-1<br>(polyclonal)          | 1:500             | Santa Cruz<br>Biotechnology | Anti-rabbit        |
| $\beta$ -Actin<br>(monoclonal) | 1:5000            | Millipore                   | Anti-mouse         |
| Ki-67 (MIB-1 clon)             | 1:200             | Dako                        | Anti-mouse         |
| CK7 (clon OV-<br>TL12/30)      | 1:100             | Dako                        | Anti-mouse         |
| CK19 (clon RKC108)             | 1:100             | Dako                        | Anti-mouse         |
