# Supplementary material for: Cancer progression by breast tumors with Pit-1-overexpression is blocked by inhibition of metalloproteinase (MMP)-13
Source: Springer Nature journal article supplement (doi:10.1186/s13058-014-0505-8), 2014-12-19

A

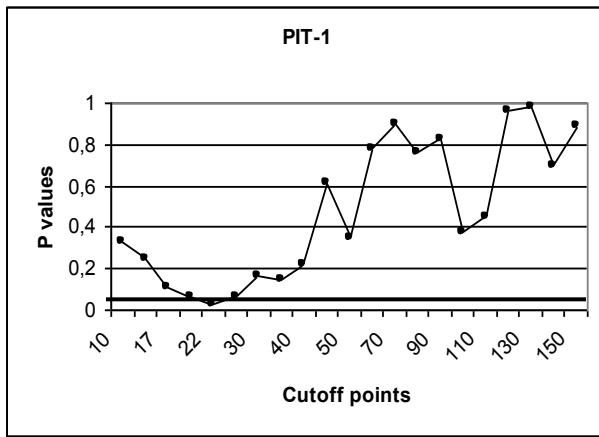

B

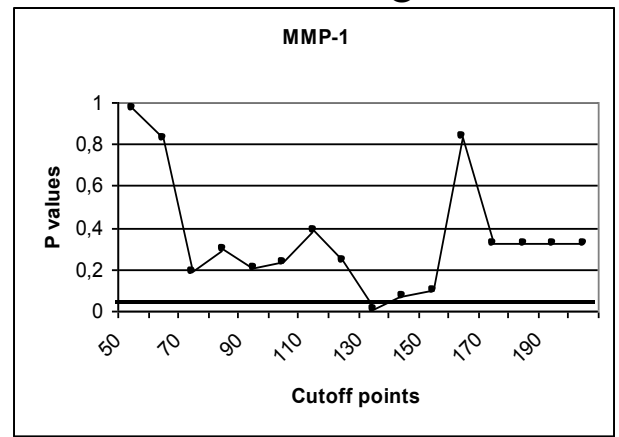

C

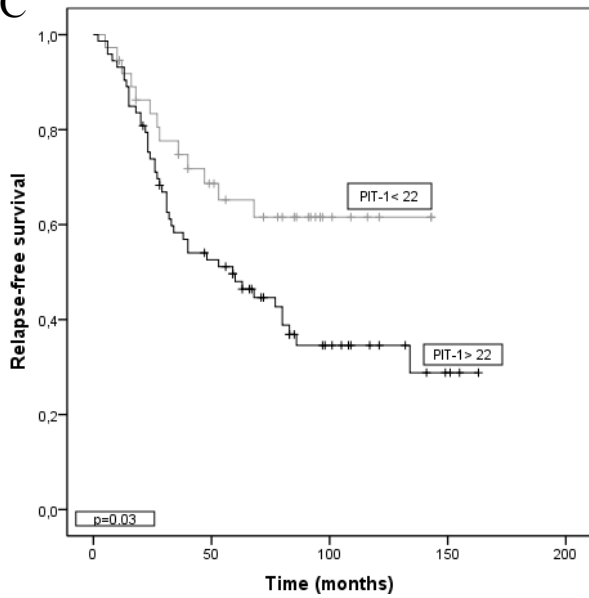

D

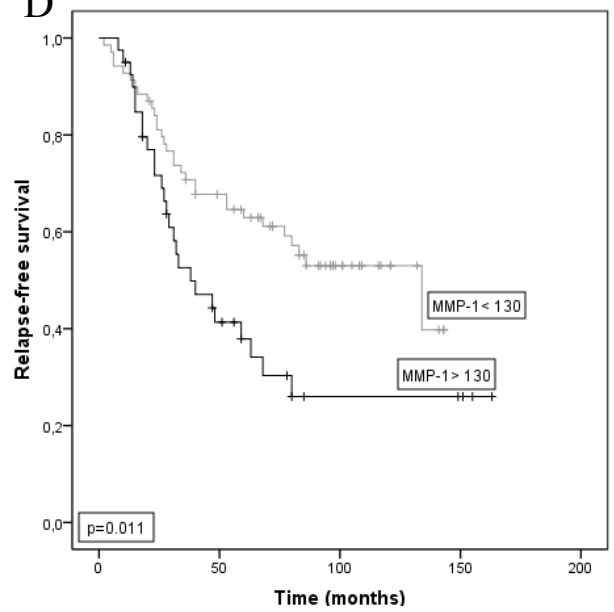

E

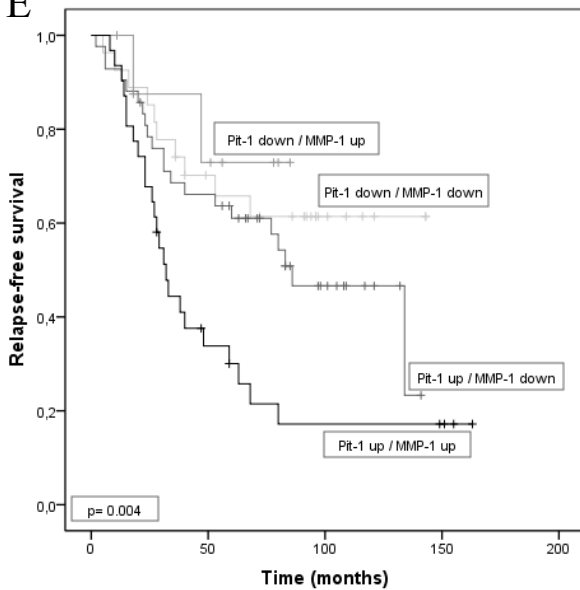

F

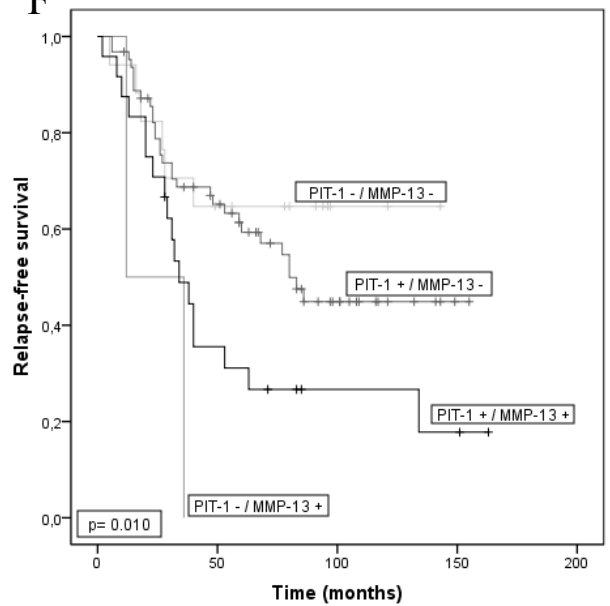

Supplement: MOESM9 [file 9781308]
