# Supplementary material for: Cancer progression by breast tumors with Pit-1-overexpression is blocked by inhibition of metalloproteinase (MMP)-13
Source: Breast Cancer Res. 2014 Dec 20;16:505. doi: 10.1186/s13058-014-0505-8 (PMC4305241; doi:10.1186/s13058-014-0505-8)
Supplement: Supplementary file 7 — Additional file 7: Table S2.: MMP-13 but not MMP-1 knockdown blocks metastasis in lung. (A) Number of metastasis in lung at day 41 (in MCF-7-hPit-1-luc- and MCF-7-hPit-1-luc-shControl-injected mice) or day 50 (in MCF-7-hPit-1-luc-shMMP-1-injected mice). Number was quantified after CK7 staining. Size represents mean + SD of total metastasis measurements. (B) Size (diameter in μm of each metastasis) and number of metastasis (specified for each mice) was evaluated using the Olympus DP-Soft morphometry program in an OlympusDX51 microscope. (PDF 186 KB) [file 13058_2014_505_MOESM7_ESM.pdf]

Additional file 7  
Table S2

A

|                            |                          |    |      |    |                |                |               |
|----------------------------|--------------------------|----|------|----|----------------|----------------|---------------|
|                            | Metastasis foci per lung |    |      |    |                | Size (X±SD)    |               |
| Mice                       | 1                        | 2  | 3    | 4  | 5              |                |               |
| MCF-7-hPit-1-luc           | 2                        | 6  | 38   | 15 | 13             | 166.2±174.1 μm |               |
| Mice                       | 1                        | 2  | 3    | 4  | 5              | 6              |               |
| MCF-7-hPit-1-luc-shControl | 2                        | 1  | 17   | 11 | 12             | 7              | 183.7±79.2 μm |
| Mice                       | 1                        | 2  | 3    | 4  |                |                |               |
| MCF-7-hPit-1-luc-shMMP-1   | 1                        | 11 | 3    | 6  | 185.5±132.1 μm |                |               |
| Mice                       |                          |    |      |    |                |                |               |
| MCF-7-hPit-1-luc-shMMP-13  | No                       |    | Foci |    | (-)            |                |               |

B

Metastasis size (diameter in  $\mu\text{m}$ ):[illegible]
